# Supplementary material
Source: publisher figshare collection journal article supplement (https://tandf.figshare.com/ndownloader/files/20755482)
Supplement: Supplementary file 1 [file 20755482]

Supplemental Material

#

# Atmospheric-dispersion database system that can immediately provide calculation results for various source term and meteorological conditions

# Hiroaki Terada, Haruyasu Nagai, Atsunori Tanaka, Katsunori Tsuduki and Masanao Kadowaki

**
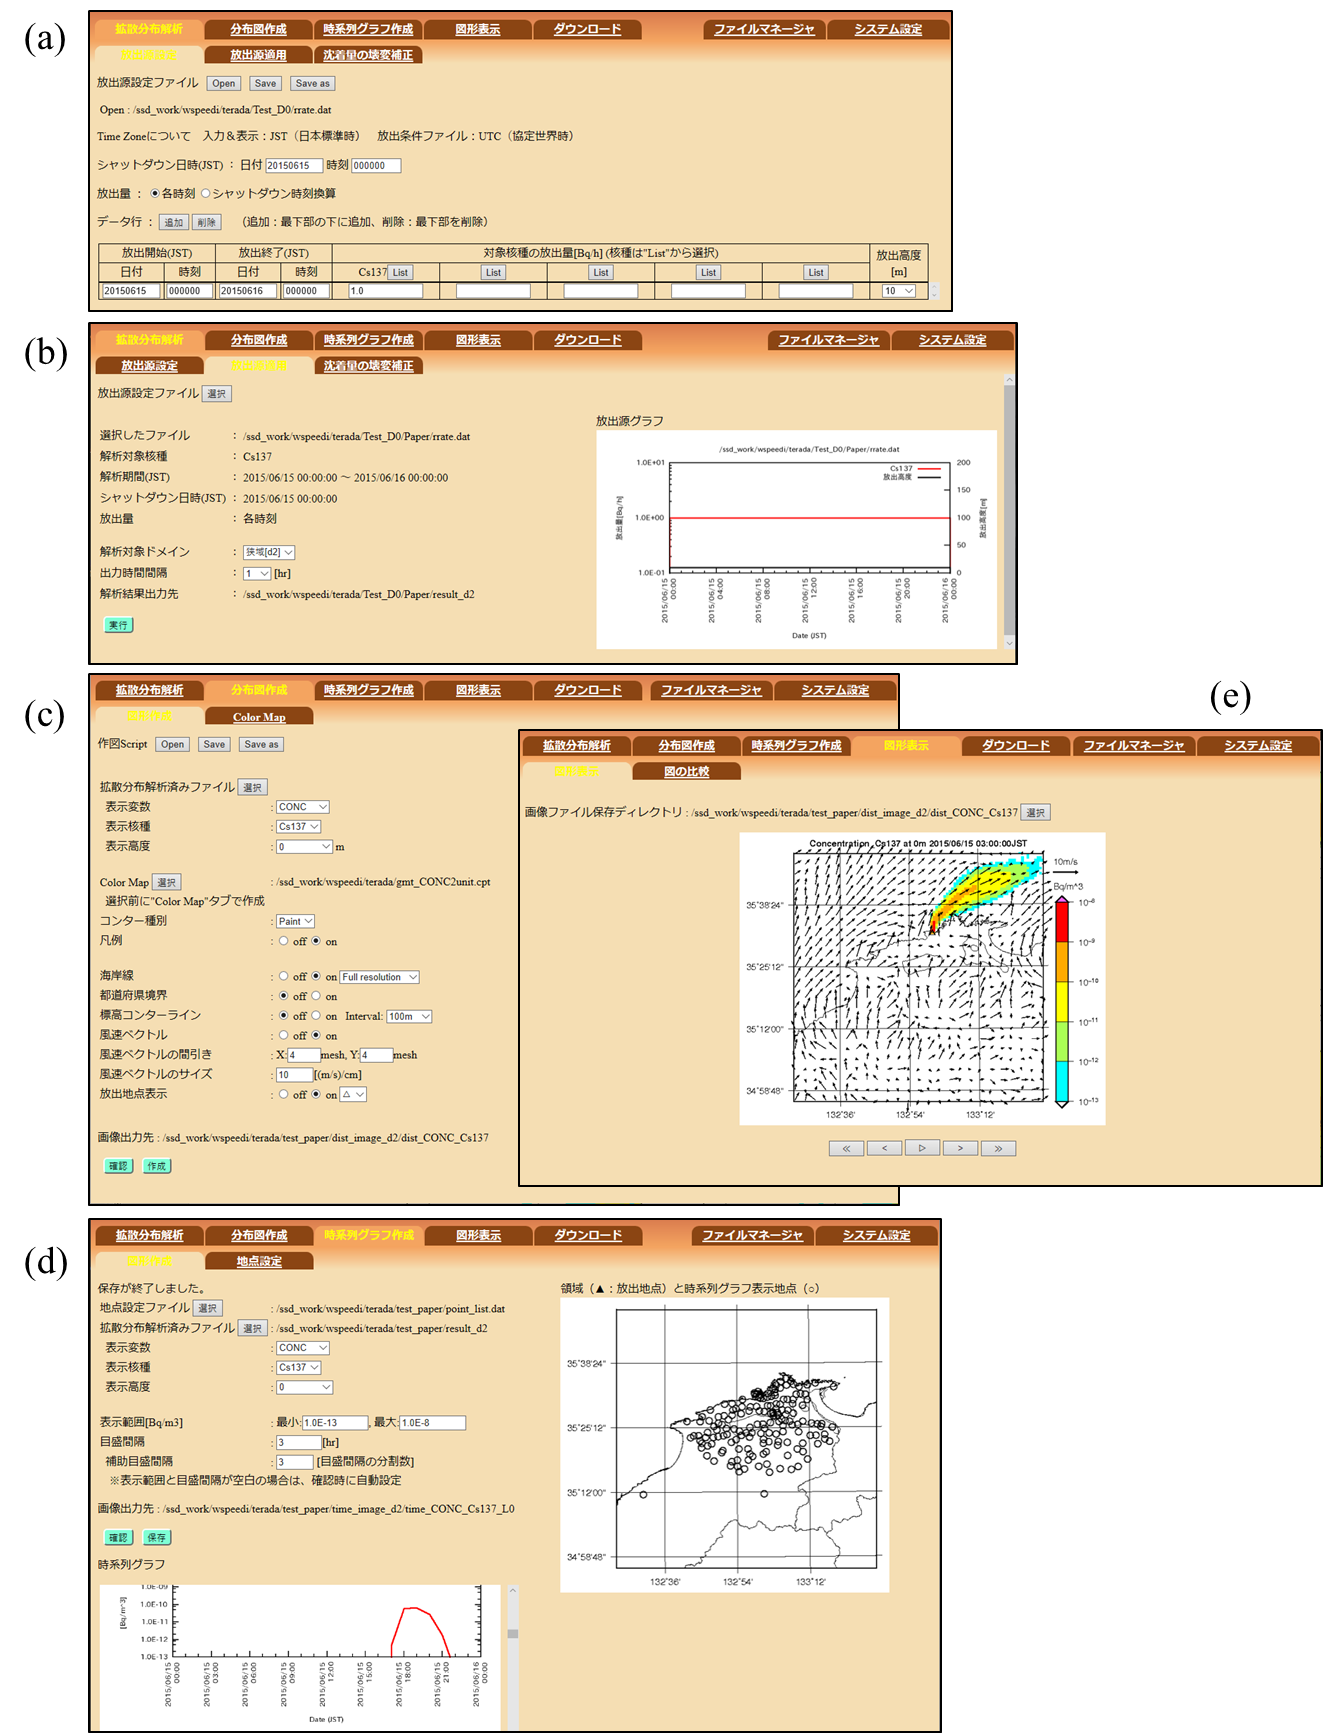
**

**Figure S1.** Example of graphical user interface (GUI) of analysis function, showing (a) windows for setting of source term, (b) producing of dispersion calculation results for various source term, (c) making of horizontal-distribution figures, (d) making of time-series graphs, and (e) display of figures.

**Figure S2.** Comparisons between calculation results using database calculation method (b and d) and those using previous conventional method (a and c): Spatial distributions of surface air concentration of 137Cs at 6:00 JST on June 15, 2015 (a and b) and surface deposition of 137Cs at 0:00 JST on June 16, 2015 (c and d) under calculation conditions for performance test.

**Figure S3.** Scatter plots of calculation results by previous conventional calculation method and database calculation method. Surface air concentration of 137Cs during entire calculation period (left) and surface deposition amount at 0:00 JST on June 16, 2015 (right) under calculation conditions for performance test. Equations of linear regression line (red) and determination coefficient (R2) are indicated in the figures.


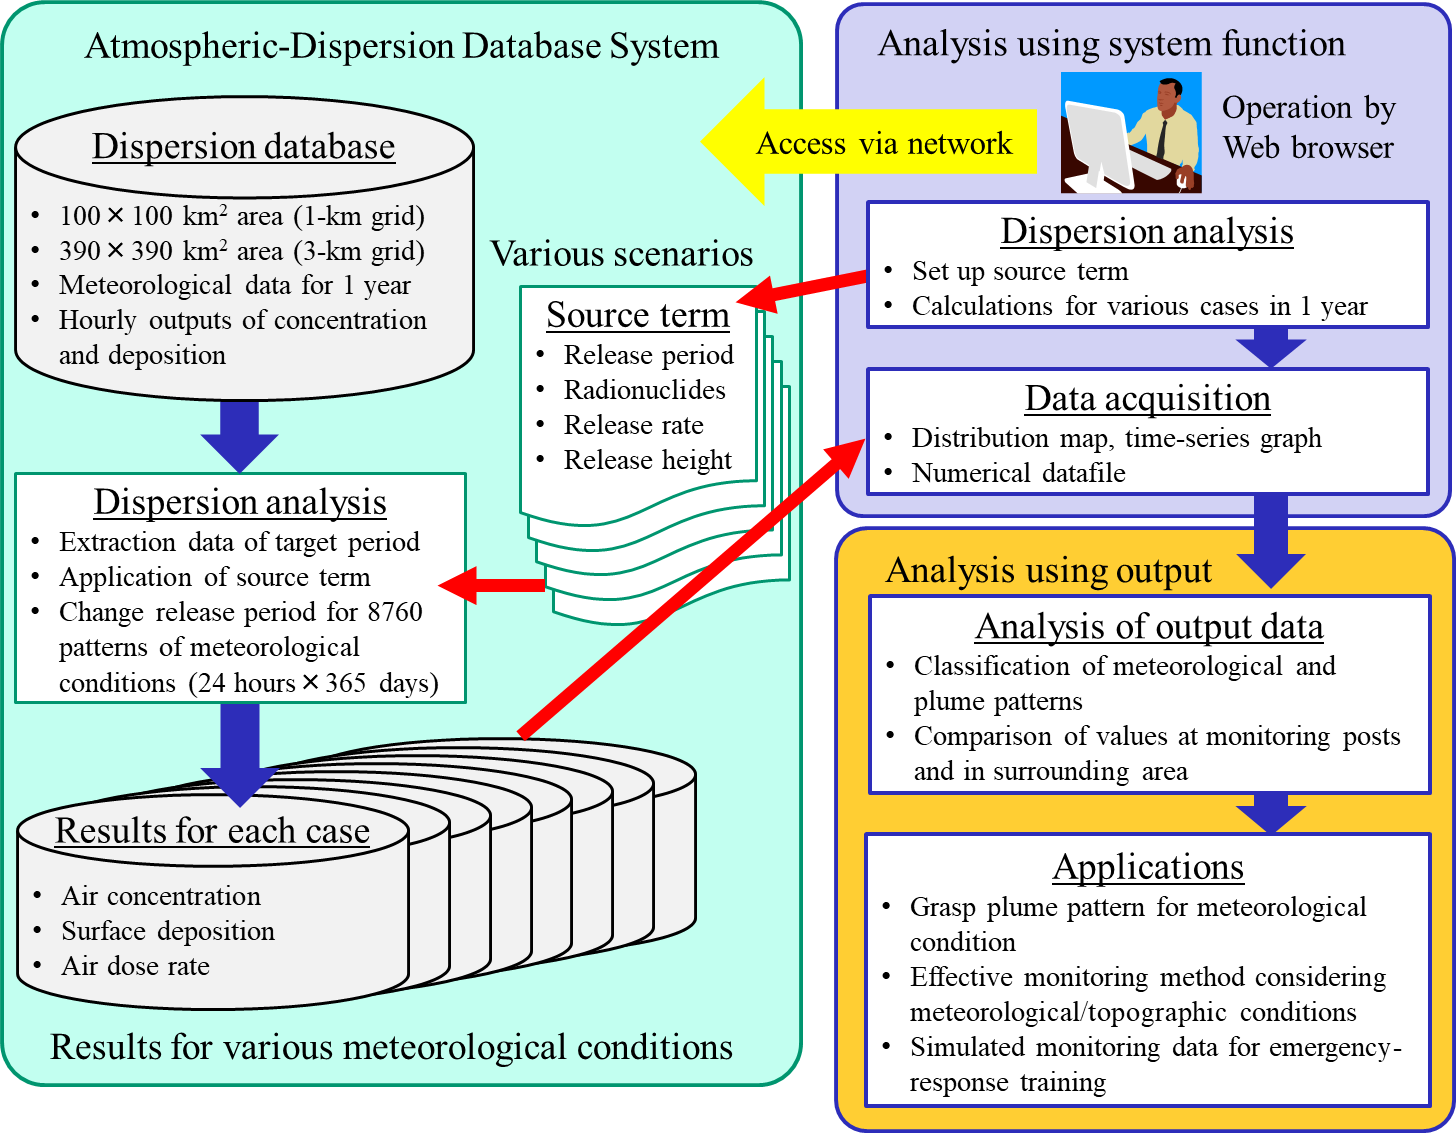


**Figure S4.** Analysis using atmospheric-dispersion database system.
